# Supplementary material for: Molecular detection and characterization of emerging pathogens of Rickettsia- felis and felis-like organisms from peri-domestic fleas in Uganda
Source: Research Square preprint supplement (doi:10.21203/rs.3.rs-3242787/v1), 2023-08-11
Supplement: Supplementary file 1 [file 0ac7f3929cbe7ab1888b9b85.docx]

Supplementary File 2

Table 1: Flea pools collected by quarters (seasons)

| Quarter | *C. canis* | *C. felis* | *E. gallinacea* | *P. irritans* | *X. cheopis* | Total |
| --- | --- | --- | --- | --- | --- | --- |
| 1 (Apr-Jun, 2017)a | 48 | 2 | 10 | 1 | 20 | 81 |
| 2 (Jul-Sep, 2017)b | 61 | 8 | 12 | 0 | 11 | 92 |
| 3 (Oct-Dec, 2017)a | 81 | 13 | 18 | 0 | 11 | 123 |
| 4 (Jan-Mar, 2018)b | 70 | 15 | 11 | 0 | 8 | 104 |
| 5 (Apr-Jun, 2018)a | 96 | 10 | 14 | 0 | 10 | 130 |
| 6 (Jul-Sep, 2018)b | 145 | 13 | 8 | 0 | 18 | 184 |
| Total | 501 | 61 | 73 | 1 | 78 | 714 |

aRainy season

bDry season

Table 2: Flea pools collected by district

| District | *C. canis* | *C. felis* | *E. gallinacea* | *P. irritans* | *X. cheopis* | Total | % |
| --- | --- | --- | --- | --- | --- | --- | --- |
| Gulu | 96 | 13 | 5 | 1 | 13 | 128 | 17.9 |
| Jinja | 105 | 14 | 14 | 0 | 14 | 147 | 20.6 |
| Kampala | 83 | 13 | 7 | 0 | 20 | 123 | 17.2 |
| Kasese | 109 | 13 | 31 | 0 | 27 | 180 | 25.2 |
| Luwero | 108 | 8 | 16 | 0 | 4 | 136 | 19.0 |
| Total | 501 | 61 | 73 | 1 | 78 | 714 | 100 |

Table 3: Fleas (unpooled) collected by quarters (seasons)

| Quarter | *C. canis* | *C. felis* | *E. gallinacea* | *P. irritans* | *X. cheopis* | Total |
| --- | --- | --- | --- | --- | --- | --- |
| 1 (Apr-Jun, 2017)a | 345 | 8 | 66 | 1 | 72 | 492 |
| 2 (Jul-Sep, 2017)b | 1211 | 63 | 659 | 0 | 32 | 1965 |
| 3 (Oct-Dec, 2017)a | 2208 | 91 | 156 | 0 | 29 | 2484 |
| 4 (Jan-Mar, 2018)b | 2164 | 243 | 91 | 0 | 23 | 2521 |
| 5 (Apr-Jun, 2018)a | 2318 | 51 | 256 | 0 | 49 | 2674 |
| 6 (Jul-Sep, 2018)b | 4176 | 148 | 128 | 0 | 53 | 4505 |
| Total | 12422 | 604 | 1356 | 1 | 258 | 14641 |

aRainy season

bDry season

Table 4: Fleas (unpooled) collected by district

| District | *C. canis* | *C. felis* | *E. gallinacea* | *P. irritans* | *X. cheopis* | Total |
| --- | --- | --- | --- | --- | --- | --- |
| Gulu | 1960 | 88 | 20 | 1 | 44 | 2113 |
| Jinja | 2501 | 223 | 270 | 0 | 51 | 3045 |
| Kampala | 2127 | 122 | 152 | 0 | 56 | 2457 |
| Kasese | 2786 | 74 | 540 | 0 | 93 | 3493 |
| Luwero | 3048 | 97 | 374 | 0 | 14 | 3533 |
| Total | 12422 | 604 | 1356 | 1 | 258 | 14641 |
