# Supplementary material for: Molecular detection and characterization of emerging pathogens of Rickettsia- felis and felis-like organisms from peri-domestic fleas in Uganda
Source: Research Square preprint supplement (doi:10.21203/rs.3.rs-3242787/v1), 2023-08-11
Supplement: Supplementary file 2 [file bb8cee1c4b178e352cfeedd3.docx]

Supplementary File 1: Number of rodents captured in different quarters (seasons)

| Districts | Rat species | Numbers captured in different quarters (seasons) | | | | | | Total | Percentage abundance |
| --- | --- | --- | --- | --- | --- | --- | --- | --- | --- |
| 2017 | | | 2018 | | |
| Apr-Juna | Jul-Sepb | Oct-Deca | Jan-Marb | Apr-Juna | Jul-Sepb |
| Kampala | *R.rattus* | 8 | 2 | 4 | 5 | 4 | 2 | 25 | 58.1 |
| Shrew | 1 | 0 | 0 | 0 | 1 | 0 | 2 | 4.7 |
| *M. musculus* | 1 | 3 | 4 | 2 | 4 | 2 | 16 | 37.2 |
| Kasese | *R.rattus* | 11 | 5 | 7 | 9 | 8 | 4 | 44 | 91.7 |
| Shrew | 1 | 0 | 0 | 0 | 0 | 0 | 1 | 2.1 |
| *M. musculus* | 0 | 0 | 1 | 0 | 0 | 2 | 3 | 6.2 |
| Jinja | *R.rattus* | 8 | 2 | 2 | 1 | 5 | 0 | 18 | 64.3 |
| Shrew | 0 | 0 | 0 | 0 | 2 | 1 | 3 | 11.5 |
| *M. musculus* | 2 | 0 | 1 | 0 | 2 | 0 | 5 | 19.2 |
| Luwero | *R.rattus* | 4 | 1 | 2 | 1 | 1 | 0 | 9 | 60 |
| Shrew | 0 | 0 | 0 | 1 | 0 | 0 | 1 | 6.7 |
| *M. musculus* | 0 | 0 | 0 | 1 | 2 | 2 | 5 | 33.3 |
| Gulu | *R.rattus* | 5 | 4 | 4 | 2 | 2 | 5 | 22 | 81.5 |
| Shrew | 0 | 0 | 1 | 0 | 1 | 0 | 2 | 7.4 |
| *M. musculus* | 0 | 0 | 0 | 0 | 1 | 2 | 3 | 11.1 |
| Total number of rodents captured per quarterly season | | 41 | 17 | 26 | 22 | 33 | 20 | 159 |  |

aRainy season

bDry season
